# Supplementary material for: Controlled Human Malaria Infection Induces Long-Term Functional Changes in Monocytes
Source: Front Mol Biosci. 2020 Nov 26;7:604553. doi: 10.3389/fmolb.2020.604553 (PMC7726436; doi:10.3389/fmolb.2020.604553)
Supplement: Supplementary Table 2 — List of Differentially Expressed Genes across RNA-seq Samples. [file Table_2.XLSX]

## Sheet: DE_Genes_RNA
feature_id	GeneID	Donor1_Base	Donor2_Base	Donor3_Base	Donor4_Base	Donor1_Day9	Donor2_Day9	Donor3_Day9	Donor4_Day9	Donor1_Day36	Donor2_Day36	Donor3_Day36	Donor4_Day36	Cluster	Direction
ENSG00000239839	DEFA3	0	2.33728	0.754688	0	167.486	273.097	128.91	3.01482	0	1.09426	22.1474	0	Only Day 9	Up Regulated
ENSG00000152766	ANKRD22	51.4458	5.45365	12.075	28.5126	890.011	105.256	151.009	754.71	101.018	20.7909	29.3303	46.5727	Only Day 9	Up Regulated
ENSG00000154451	GBP5	744.562	372.406	445.266	636.782	19025.2	4063.74	3679.45	9938.85	1931.78	523.054	600.374	560.131	Only Day 9	Up Regulated
ENSG00000012223	LTF	1.87076	3.89546	8.30156	0	69.1365	119.48	100.672	1.00494	3.10826	13.1311	56.865	2.51744	Only Day 9	Up Regulated
ENSG00000100336	APOL4	15.9014	3.89546	12.8297	4.7521	277.52	44.0937	110.494	76.3754	38.0762	7.65979	14.9645	25.1744	Only Day 9	Up Regulated
ENSG00000117228	GBP1	749.238	352.15	361.495	573.42	10312.1	2836.22	3090.15	7396.36	1819.11	461.776	596.783	576.494	Only Day 9	Up Regulated
ENSG00000169245	CXCL10	78.5718	36.6173	38.4891	161.572	1544.37	297.277	299.562	1446.11	104.904	33.9219	108.343	95.6628	Only Day 9	Up Regulated
ENSG00000026751	SLAMF7	54.252	58.4319	57.3563	68.1135	1321.38	453.739	166.969	471.317	134.432	70.0324	39.5062	75.5233	Only Day 9	Up Regulated
ENSG00000244734	HBB	51.4458	66.2228	113.958	294.63	2025.41	1622.93	1303.83	104.514	385.424	164.138	3639.96	319.715	Only Day 9	Up Regulated
ENSG00000168062	BATF2	23.3845	9.34911	12.075	11.0882	206.436	91.0322	41.7422	147.726	41.1844	24.0736	11.9716	25.1744	Only Day 9	Up Regulated
ENSG00000173369	C1QB	6.54765	19.4773	3.77344	7.92017	103.218	108.101	22.0988	101.499	14.7642	6.56553	8.97868	20.1395	Only Day 9	Up Regulated
ENSG00000188820	CALHM6	75.7657	21.8146	64.1484	42.7689	713.761	190.599	256.592	457.248	122.776	25.1679	80.8081	35.2442	Only Day 9	Up Regulated
ENSG00000158714	SLAMF8	17.7722	17.9191	8.30156	12.6723	143.142	72.5413	88.3953	102.504	42.7385	21.8851	18.5559	31.468	Only Day 9	Up Regulated
ENSG00000119917	IFIT3	497.622	125.434	215.841	489.467	2264.95	704.077	590.53	4265.97	683.817	195.872	383.09	393.98	Only Day 9	Up Regulated
ENSG00000132465	JCHAIN	13.0953	17.14	13.5844	4.7521	123.667	86.7651	66.2965	26.1284	29.5285	38.299	77.8152	12.5872	Only Day 9	Up Regulated
ENSG00000162654	GBP4	550.003	341.242	502.622	481.546	4493.87	1456.52	1699.15	2851.01	1186.58	332.654	460.905	438.035	Only Day 9	Up Regulated
ENSG00000137959	IFI44L	983.083	195.552	606.014	1081.9	4021.6	1327.08	1198.25	9122.84	1447.67	334.842	751.216	991.872	Only Day 9	Up Regulated
ENSG00000185745	IFIT1	710.888	186.203	332.063	635.198	2391.54	756.705	731.716	5716.1	785.612	284.507	534.531	542.509	Only Day 9	Up Regulated
ENSG00000108679	LGALS3BP	42.092	49.8619	41.5078	33.2647	262.913	216.202	85.9399	297.462	65.2734	22.9794	25.1403	50.3489	Only Day 9	Up Regulated
ENSG00000134321	RSAD2	274.066	94.2702	160.748	226.517	756.607	260.295	249.226	2497.27	310.049	100.672	253.797	240.416	Only Day 9	Up Regulated
ENSG00000119922	IFIT2	861.484	272.682	453.567	690.639	3483.12	852.005	1004.27	5857.79	1014.07	341.408	574.635	538.733	Only Day 9	Up Regulated
ENSG00000164116	GUCY1A1	20.5783	46.7455	9.81094	3.16807	171.381	91.0322	33.1482	79.3902	42.7385	6.56553	4.78863	10.0698	Only Day 9	Up Regulated
ENSG00000133106	EPSTI1	681.891	433.175	404.513	544.908	3167.62	1493.5	1150.37	3432.87	1041.27	422.383	553.086	664.605	Only Day 9	Up Regulated
ENSG00000168899	VAMP5	67.3473	46.7455	32.4516	31.6807	336.919	164.996	84.7121	223.097	97.9101	38.299	38.9076	60.4186	Only Day 9	Up Regulated
ENSG00000173372	C1QA	64.5411	95.8283	37.7344	60.1933	404.108	322.88	76.1182	363.788	89.3624	50.3358	32.3232	74.2646	Only Day 9	Up Regulated
ENSG00000163568	AIM2	157.144	52.1992	151.692	129.891	965.964	297.277	358.492	524.578	262.648	97.3888	147.849	80.5582	Only Day 9	Up Regulated
ENSG00000142089	IFITM3	86.0549	42.071	41.5078	20.5924	360.289	71.1189	98.217	307.512	83.923	40.4875	44.8934	17.6221	Only Day 9	Up Regulated
ENSG00000187608	ISG15	220.749	130.108	171.314	294.63	866.641	369.818	335.165	1890.29	244.775	151.007	237.037	191.326	Only Day 9	Up Regulated
ENSG00000150337	FCGR1A	121.599	169.842	86.0344	213.845	839.376	428.136	316.75	908.465	268.087	170.704	146.053	182.515	Only Day 9	Up Regulated
ENSG00000002549	LAP3	1543.38	814.93	1195.43	1218.12	6693.58	2413.78	3468.29	6049.74	2438.43	772.545	1503.63	1204.6	Only Day 9	Up Regulated
ENSG00000115415	STAT1	3474	2493.1	2660.27	3187.08	14866.3	8121.78	8746.22	13596.8	7231.36	2499.28	3181.44	3564.7	Only Day 9	Up Regulated
ENSG00000138646	HERC5	307.74	123.097	214.331	302.551	823.796	311.501	369.541	2141.53	345.794	119.274	302.881	246.709	Only Day 9	Up Regulated
ENSG00000162645	GBP2	1946.52	1469.37	1542.58	1763.03	9688.85	4328.3	4346.1	7351.13	3276.88	1492.56	1874.15	1806.26	Only Day 9	Up Regulated
ENSG00000004468	CD38	94.4733	42.8501	61.8844	80.7858	537.512	155.039	122.771	239.176	175.617	45.9587	69.4351	83.0756	Only Day 9	Up Regulated
ENSG00000203747	FCGR3A	1100.94	828.954	603.75	1181.69	5906.79	2415.2	1252.27	3968.51	1324.12	459.587	532.136	1064.88	Only Day 9	Up Regulated
ENSG00000124256	ZBP1	42.092	34.2801	68.6766	45.937	167.486	122.325	112.95	294.447	41.9615	39.3932	56.2664	85.593	Only Day 9	Up Regulated
ENSG00000020577	SAMD4A	105.698	95.8283	107.166	128.307	497.588	283.053	241.859	491.415	134.432	99.5773	92.1811	163.634	Only Day 9	Up Regulated
ENSG00000134326	CMPK2	291.838	106.736	181.125	202.756	593.016	240.382	288.512	1550.62	268.087	99.5773	253.199	249.227	Only Day 9	Up Regulated
ENSG00000177409	SAMD9L	1945.59	664.566	1471.64	1775.7	5830.84	3065.23	2933	7884.76	3371.68	1055.96	1409.65	1331.73	Only Day 9	Up Regulated
ENSG00000137965	IFI44	984.019	317.091	570.544	1322.67	2486.97	1257.38	1113.54	5726.15	1346.65	431.137	858.96	980.544	Only Day 9	Up Regulated
ENSG00000145287	PLAC8	556.55	451.873	488.283	508.475	2488.91	809.333	811.518	2454.06	714.122	357.822	449.532	522.369	Only Day 9	Up Regulated
ENSG00000135114	OASL	241.328	103.619	123.769	166.324	508.299	182.064	201.345	1168.74	216.801	122.557	179.574	219.017	Only Day 9	Up Regulated
ENSG00000162614	NEXN	77.6364	35.8382	41.5078	82.3698	200.593	140.815	93.3061	339.67	81.5918	61.2783	56.865	31.468	Only Day 9	Up Regulated
ENSG00000101017	CD40	125.341	43.6292	50.5641	87.1219	404.108	140.815	139.959	304.497	156.19	20.7909	47.8863	99.439	Only Day 9	Up Regulated
ENSG00000126709	IFI6	407.825	217.367	273.952	289.878	1097.42	445.204	454.254	1757.64	352.01	160.856	351.964	385.169	Only Day 9	Up Regulated
ENSG00000133321	RARRES3	205.783	158.935	148.673	164.74	979.596	327.147	362.175	475.336	254.877	151.007	243.023	152.305	Only Day 9	Up Regulated
ENSG00000029153	ARNTL2	14.9661	30.3846	25.6594	41.1849	84.7166	65.4294	65.0687	145.716	48.9551	19.6966	50.8792	50.3489	Only Day 9	Up Regulated
ENSG00000088827	SIGLEC1	161.821	38.9546	89.0531	99.7942	293.1	179.22	155.919	594.924	114.228	40.4875	67.0408	192.584	Only Day 9	Up Regulated
ENSG00000198019	FCGR1B	71.0888	64.6647	68.6766	95.0421	342.761	132.281	106.811	348.714	121.222	68.9381	69.4351	59.1599	Only Day 9	Up Regulated
ENSG00000145365	TIFA	88.861	39.7337	115.467	106.13	407.029	163.574	180.474	333.64	162.406	68.9381	94.5754	88.1105	Only Day 9	Up Regulated
ENSG00000157601	MX1	1182.32	703.52	1090.52	1492.16	2591.16	1282.99	1705.29	8009.37	1195.9	737.528	1196.56	1524.31	Only Day 9	Up Regulated
ENSG00000128383	APOBEC3A	544.39	389.546	599.977	755.584	1592.09	634.381	922.012	3773.55	555.601	261.527	580.621	955.369	Only Day 9	Up Regulated
ENSG00000221963	APOL6	2258.94	1510.66	1591.64	1772.53	6563.1	3491.94	4134.93	7360.18	3680.18	1643.57	2181.82	1846.54	Only Day 9	Up Regulated
ENSG00000137628	DDX60	860.549	317.091	670.917	690.639	2135.44	1039.76	1235.08	3230.88	1306.25	576.673	817.06	717.471	Only Day 9	Up Regulated
ENSG00000160932	LY6E	235.715	169.063	227.161	242.357	662.152	329.992	484.946	1141.61	222.24	90.8232	274.747	237.898	Only Day 9	Up Regulated
ENSG00000125148	MT2A	38.3505	20.2564	24.9047	19.0084	107.113	36.9818	77.3459	90.4446	34.9679	18.6023	43.6962	31.468	Only Day 9	Up Regulated
ENSG00000038945	MSR1	290.903	148.807	249.802	495.803	879.3	361.284	568.431	1713.42	337.246	108.331	450.131	512.3	Only Day 9	Up Regulated
ENSG00000138496	PARP9	1020.5	976.203	993.169	1365.44	3784.98	2026.89	1970.48	5124.19	1868.06	906.044	1191.17	1344.31	Only Day 9	Up Regulated
ENSG00000100911	PSME2	1096.26	950.492	856.57	1051.8	3964.15	2184.77	1894.36	3660.99	1406.49	855.708	991.246	1129.07	Only Day 9	Up Regulated
ENSG00000135047	CTSL	105.698	150.365	105.656	261.366	647.546	361.284	146.098	678.334	125.107	128.028	104.751	171.186	Only Day 9	Up Regulated
ENSG00000137757	CASP5	33.6736	31.9428	48.3	41.1849	116.85	98.1441	92.0784	153.756	41.9615	38.299	46.6891	44.0552	Only Day 9	Up Regulated
ENSG00000121858	TNFSF10	3191.51	1257.45	2042.18	2711.87	10055	4434.98	3794.86	8499.78	4823.24	1886.5	2615.19	1934.65	Only Day 9	Up Regulated
ENSG00000133739	LRRCC1	58.9289	37.3964	39.2438	38.0168	185.987	110.946	76.1182	107.529	92.4707	43.7702	59.2593	41.5378	Only Day 9	Up Regulated
ENSG00000055130	CUL1	658.507	644.309	693.558	649.454	2114.99	1258.81	1457.29	2275.18	1097.22	618.255	692.555	742.646	Only Day 9	Up Regulated
ENSG00000173706	HEG1	86.0549	119.201	123.769	115.635	296.995	294.432	186.612	421.07	115.783	100.672	62.8507	151.047	Only Day 9	Up Regulated
ENSG00000116663	FBXO6	67.3473	63.8856	58.8656	85.5379	228.832	130.859	137.504	245.205	87.0312	62.3726	82.6038	105.733	Only Day 9	Up Regulated
ENSG00000137193	PIM1	152.467	275.02	132.07	255.03	390.475	355.595	277.463	1151.66	152.305	195.872	191.545	230.346	Only Day 9	Up Regulated
ENSG00000172159	FRMD3	178.657	133.225	85.2797	88.7059	509.273	305.811	164.513	316.556	223.018	101.766	116.723	123.355	Only Day 9	Up Regulated
ENSG00000172183	ISG20	45.8336	63.8856	49.0547	87.1219	178.197	120.902	99.4447	255.255	61.3881	48.1473	70.0337	60.4186	Only Day 9	Up Regulated
ENSG00000168394	TAP1	800.684	1021.39	846.005	915.572	2807.33	1644.27	1727.39	3252.99	1205.23	860.085	1000.82	855.93	Only Day 9	Up Regulated
ENSG00000111331	OAS3	769.817	388.767	609.788	864.883	1626.17	884.719	1016.55	3394.69	865.65	358.916	535.728	833.273	Only Day 9	Up Regulated
ENSG00000169313	P2RY12	62.6704	24.1519	22.6406	52.2731	158.722	98.1441	61.3856	109.538	80.0376	20.7909	37.7104	25.1744	Only Day 9	Up Regulated
ENSG00000240065	PSMB9	488.268	443.303	498.849	548.076	1793.65	921.701	1003.04	1325.52	577.359	454.116	564.459	450.622	Only Day 9	Up Regulated
ENSG00000140105	WARS	2274.84	3146.75	2482.17	2719.79	8587.53	4918.58	4532.71	8898.74	2732.94	2738.92	2572.69	2859.81	Only Day 9	Up Regulated
ENSG00000156587	UBE2L6	432.145	453.432	327.534	294.63	1039	712.612	635.955	1333.55	435.156	377.518	433.371	372.581	Only Day 9	Up Regulated
ENSG00000185880	TRIM69	238.522	189.319	172.069	251.861	759.528	328.569	304.473	706.473	296.062	155.384	172.391	302.093	Only Day 9	Up Regulated
ENSG00000157827	FMNL2	95.4086	86.4792	105.656	155.235	319.391	213.357	202.573	352.734	130.547	94.106	96.9697	117.061	Only Day 9	Up Regulated
ENSG00000068079	IFI35	228.232	225.158	236.972	217.013	557.961	317.19	335.165	1004.94	240.89	245.113	250.804	293.282	Only Day 9	Up Regulated
ENSG00000117226	GBP3	463.948	161.272	358.477	129.891	1300.93	399.688	664.192	348.714	715.676	282.318	442.948	167.41	Only Day 9	Up Regulated
ENSG00000132530	XAF1	962.505	366.952	825.628	1043.88	2080.91	1069.63	1445.02	3185.66	1433.68	670.779	920.015	876.07	Only Day 9	Up Regulated
ENSG00000152778	IFIT5	574.323	248.53	468.661	559.164	1343.78	678.475	624.906	1817.94	784.058	477.096	547.101	473.279	Only Day 9	Up Regulated
ENSG00000111335	OAS2	1025.18	599.122	831.666	833.202	1869.61	1163.51	1308.74	3587.63	1094.11	555.882	848.186	978.026	Only Day 9	Up Regulated
ENSG00000173193	PARP14	4585.23	3150.65	4501.71	3234.6	11433.8	7010.9	7863.5	10509.7	7516.55	4124.25	4768.87	3584.84	Only Day 9	Up Regulated
ENSG00000138119	MYOF	814.715	1026.06	776.574	939.332	2416.86	2086.63	1252.27	2667.11	1149.28	705.795	571.642	1024.6	Only Day 9	Up Regulated
ENSG00000131979	GCH1	807.232	646.647	773.555	883.891	2341.88	1233.2	1146.68	2645	975.993	546.034	781.743	760.268	Only Day 9	Up Regulated
ENSG00000138821	SLC39A8	57.0581	72.4556	68.6766	63.3614	112.955	190.599	101.9	217.067	91.6936	152.102	129.892	123.355	Only Day 9	Up Regulated
ENSG00000129757	CDKN1C	94.4733	74.7929	107.166	117.219	355.42	142.238	192.751	232.141	75.3753	36.1104	99.364	112.026	Only Day 9	Up Regulated
ENSG00000136514	RTP4	100.086	68.5601	105.656	133.059	333.024	149.35	116.633	347.709	155.413	102.86	114.328	67.9709	Only Day 9	Up Regulated
ENSG00000128284	APOL3	859.613	897.514	900.342	980.517	3122.83	1603.02	1435.2	2221.92	1097.22	832.729	854.171	1092.57	Only Day 9	Up Regulated
ENSG00000150347	ARID5B	93.5379	80.2465	110.939	79.2017	319.391	166.418	151.009	186.919	133.655	51.43	90.9839	64.1948	Only Day 9	Up Regulated
ENSG00000123240	OPTN	35.5444	14.8028	41.5078	79.2017	136.326	48.3609	81.029	120.593	55.1716	10.9426	56.865	39.0204	Only Day 9	Up Regulated
ENSG00000107201	DDX58	898.899	422.268	776.574	818.946	1730.36	1028.38	1058.29	2682.18	1145.39	644.517	770.969	816.91	Only Day 9	Up Regulated
ENSG00000047634	SCML1	81.378	198.669	52.8281	50.6891	248.307	327.147	116.633	161.795	102.573	198.06	65.8436	67.9709	Only Day 9	Up Regulated
ENSG00000111181	SLC6A12	75.7657	84.9211	57.3563	53.8572	246.36	108.101	77.3459	169.835	69.9358	71.1266	44.8934	50.3489	Only Day 9	Up Regulated
ENSG00000038210	PI4K2B	160.885	81.0256	141.127	120.387	292.126	251.761	214.85	340.675	223.795	166.327	235.241	161.116	Only Day 9	Up Regulated
ENSG00000197121	PGAP1	83.2487	37.3964	52.8281	41.1849	150.932	54.0504	89.623	176.869	127.439	49.2415	73.6251	67.9709	Only Day 9	Up Regulated
ENSG00000155962	CLIC2	77.6364	84.9211	61.8844	80.7858	113.929	238.96	127.682	186.919	69.9358	134.593	111.336	75.5233	Only Day 9	Up Regulated
ENSG00000141574	SECTM1	228.232	454.211	217.35	266.118	640.73	509.212	373.225	1004.94	265.756	263.716	269.36	315.939	Only Day 9	Up Regulated
ENSG00000183087	GAS6	16.8368	49.8619	35.4703	49.1051	59.399	62.5847	67.5242	141.696	15.5413	27.3564	15.563	30.2093	Only Day 9	Up Regulated
ENSG00000152229	PSTPIP2	644.476	546.144	425.644	584.509	1423.63	1041.18	1143	1123.52	1000.08	594.181	689.562	678.451	Only Day 9	Up Regulated
ENSG00000182541	LIMK2	214.202	208.797	177.352	145.731	478.113	247.494	305.7	566.786	219.909	202.437	181.968	177.48	Only Day 9	Up Regulated
ENSG00000111912	NCOA7	340.478	172.179	301.12	278.79	729.341	315.768	390.412	898.416	469.347	222.134	334.007	260.555	Only Day 9	Up Regulated
ENSG00000128335	APOL2	318.029	303.846	305.648	293.046	865.667	477.919	467.758	766.769	425.831	286.695	309.465	361.253	Only Day 9	Up Regulated
ENSG00000019169	MARCO	290.903	418.373	200.747	343.735	625.15	758.128	396.551	860.228	233.119	365.481	284.325	371.323	Only Day 9	Up Regulated
ENSG00000132274	TRIM22	3175.61	2431.55	2620.28	3256.77	7103.53	3803.44	4089.51	9114.8	3577.61	2475.21	3350.24	3246.24	Only Day 9	Up Regulated
ENSG00000166750	SLFN5	721.177	352.929	582.619	689.055	1650.51	1093.81	629.816	1550.62	1148.5	639.045	539.319	683.486	Only Day 9	Up Regulated
ENSG00000115267	IFIH1	492.945	310.858	603.75	606.685	1134.42	726.835	794.33	1568.71	844.669	446.456	557.277	551.32	Only Day 9	Up Regulated
ENSG00000041357	PSMA4	1500.35	1025.29	1055.05	1565.03	3602.89	1944.39	2015.9	3219.83	1915.46	1296.69	1548.52	1208.37	Only Day 9	Up Regulated
ENSG00000125347	IRF1	3804.19	3067.29	2645.18	3486.46	8275.93	5003.93	5932.31	8017.41	4374.1	2470.83	2435.02	3092.68	Only Day 9	Up Regulated
ENSG00000028116	VRK2	438.693	295.276	513.188	505.307	1010.76	770.929	762.409	1074.28	763.854	386.272	565.657	466.986	Only Day 9	Up Regulated
ENSG00000148175	STOM	324.576	362.278	338.855	318.391	866.641	560.417	611.401	733.606	535.397	298.732	404.639	395.238	Only Day 9	Up Regulated
ENSG00000204267	TAP2	278.743	300.73	236.972	224.933	587.173	385.465	556.154	593.919	377.653	240.736	290.909	197.619	Only Day 9	Up Regulated
ENSG00000205413	SAMD9	1895.08	881.153	2002.19	1606.21	3395.48	2159.17	2295.82	5054.85	2494.38	1833.97	2142.91	1281.38	Only Day 9	Up Regulated
ENSG00000001561	ENPP4	65.4765	36.6173	43.0172	45.937	130.483	61.1623	76.1182	118.583	76.9294	49.2415	68.8365	46.5727	Only Day 9	Up Regulated
ENSG00000165929	TC2N	10.2892	8.57001	23.3953	14.2563	120.745	79.6532	62.6133	27.1334	70.7129	29.5449	122.709	30.2093	Day9 & Day36	Up Regulated
ENSG00000054654	SYNE2	39.2859	55.3155	62.6391	69.6975	351.525	241.804	238.176	117.578	187.273	97.3888	195.137	79.2994	Day9 & Day36	Up Regulated
ENSG00000049759	NEDD4L	61.735	58.4319	67.1672	64.9454	38.9501	9.95665	31.9205	54.2667	64.4964	42.676	38.9076	100.698	Only Day 9	Down Regulated
ENSG00000164403	SHROOM1	86.9902	107.515	96.6	53.8572	39.9239	52.628	61.3856	19.0939	66.8276	83.1634	68.2379	33.9855	Only Day 9	Down Regulated
ENSG00000147883	CDKN2B	123.47	55.3155	87.5438	91.874	52.5827	41.249	38.0591	40.1976	108.012	59.0898	78.4138	36.5029	Only Day 9	Down Regulated
ENSG00000171604	CXXC5	129.082	167.505	101.128	159.987	87.6378	48.3609	73.6627	51.2519	114.228	164.138	167.003	94.4041	Only Day 9	Down Regulated
ENSG00000131355	ADGRE3	362.927	277.357	319.233	394.425	171.381	139.393	182.929	128.632	271.973	254.962	261.579	362.512	Only Day 9	Down Regulated
ENSG00000179639	FCER1A	143.113	225.158	166.031	31.6807	63.294	115.213	61.3856	15.0741	125.107	252.773	142.462	13.8459	Only Day 9	Down Regulated
ENSG00000130844	ZNF331	106.633	242.298	70.9406	255.03	68.1628	83.9203	56.4748	95.4693	69.1587	100.672	68.2379	154.823	Only Day 9	Down Regulated
ENSG00000163606	CD200R1	57.9935	49.8619	69.4313	60.1933	24.3438	35.5595	20.8711	23.1136	44.2927	86.4462	62.2522	65.4535	Only Day 9	Down Regulated
ENSG00000171408	PDE7B	108.504	110.631	62.6391	166.324	54.5302	42.6714	56.4748	41.2025	74.5982	85.352	59.2593	56.6425	Only Day 9	Down Regulated
ENSG00000172037	LAMB2	78.5718	88.8165	109.43	36.4328	33.1076	31.2923	58.9302	10.0494	48.178	60.1841	57.4635	23.9157	Only Day 9	Down Regulated
ENSG00000122547	EEPD1	167.433	146.469	157.73	139.395	55.504	68.2742	73.6627	62.3063	129.77	140.065	118.519	128.39	Only Day 9	Down Regulated
ENSG00000160111	CPAMD8	98.2148	131.667	113.958	106.13	20.4488	64.007	65.0687	39.1926	62.9422	164.138	92.1811	133.424	Only Day 9	Down Regulated
ENSG00000163421	PROK2	252.552	84.142	59.6203	45.937	73.0315	38.4042	28.2374	45.2223	167.069	74.4094	68.8365	44.0552	Only Day 9	Down Regulated
ENSG00000111110	PPM1H	144.984	180.749	141.881	139.395	50.6352	81.0756	88.3953	30.1482	130.547	135.688	167.602	132.166	Only Day 9	Down Regulated
ENSG00000163806	SPDYA	72.0242	63.8856	37.7344	90.29	27.2651	17.0685	38.0591	22.1087	50.5092	36.1104	32.3232	25.1744	Only Day 9	Down Regulated
ENSG00000154736	ADAMTS5	124.405	52.9783	190.181	66.5294	30.1864	41.249	77.3459	24.1186	153.082	123.651	114.328	52.8663	Only Day 9	Down Regulated
ENSG00000091262	ABCC6	103.827	72.4556	52.0734	49.1051	25.3176	32.7147	28.2374	21.1037	69.9358	101.766	29.9289	65.4535	Only Day 9	Down Regulated
ENSG00000197632	SERPINB2	182.399	126.992	39.9984	125.139	38.9501	52.628	15.9603	74.3655	75.3753	163.044	47.8863	51.6076	Only Day 9	Down Regulated
ENSG00000182389	CACNB4	53.3166	28.8264	138.108	38.0168	13.6326	22.7581	40.5145	17.084	71.4899	71.1266	103.554	45.314	Only Day 9	Down Regulated
ENSG00000093134	VNN3	735.208	430.059	310.177	351.656	186.961	140.815	146.098	163.805	608.442	249.49	265.17	239.157	Only Day 9	Down Regulated
ENSG00000157168	NRG1	130.018	224.379	181.125	213.845	29.2126	54.0504	31.9205	141.696	95.5789	231.982	94.5754	220.276	Only Day 9	Down Regulated
ENSG00000184221	OLIG1	42.092	55.3155	104.147	128.307	9.73754	19.9133	47.8808	32.1581	57.5028	45.9587	77.8152	130.907	Only Day 9	Down Regulated
ENSG00000087589	CASS4	91.6671	171.4	72.45	76.0337	35.0551	48.3609	31.9205	12.0593	69.1587	118.18	44.8934	66.7122	Only Day 9	Down Regulated
ENSG00000169508	GPR183	381.635	883.491	194.709	584.509	90.5591	116.635	207.483	146.721	135.986	224.322	234.044	75.5233	Only Day 9	Down Regulated
ENSG00000115594	IL1R1	61.735	85.7001	67.1672	31.6807	3.89501	8.53427	17.188	13.0642	52.0633	50.3358	57.4635	74.2646	Only Day 9	Down Regulated
ENSG00000137801	THBS1	1907.24	7722.36	264.895	1889.75	70.1103	156.462	212.394	240.181	822.134	1331.71	686.569	640.689	Only Day 9	Down Regulated
ENSG00000139112	GABARAPL1	939.12	1582.34	595.449	1409.79	550.171	533.392	547.56	611.003	400.965	508.829	478.863	636.913	Only Day 36	Down Regulated
ENSG00000057657	PRDM1	82.3133	172.958	73.2047	63.3614	70.1103	48.3609	51.5639	22.1087	39.6303	38.299	45.492	25.1744	Day9 & Day36	Down Regulated
ENSG00000124731	TREM1	2532.07	3704.58	1267.88	2539.21	734.21	1076.74	1254.72	1538.56	1089.44	1214.62	962.514	906.279	Day9 & Day36	Down Regulated
ENSG00000162772	ATF3	486.397	853.106	125.278	589.261	240.517	176.375	227.127	266.309	73.0441	36.1104	33.5204	36.5029	Day9 & Day36	Down Regulated
ENSG00000171174	RBKS	193.623	239.181	224.897	251.861	87.6378	95.2994	111.722	94.4643	52.8404	103.954	52.0763	123.355	Day9 & Day36	Down Regulated
ENSG00000277632	CCL3	2399.25	1724.91	759.97	1774.12	931.882	923.124	429.699	577.84	268.864	212.286	126.899	124.613	Day9 & Day36	Down Regulated
ENSG00000161835	GRASP	73.8949	218.925	53.5828	221.765	26.2913	71.1189	93.3061	46.2272	14.7642	19.6966	29.9289	60.4186	Only Day 36	Down Regulated
ENSG00000073756	PTGS2	1239.38	1330.69	1039.96	1316.33	453.769	386.887	418.65	689.389	671.384	270.281	279.536	193.843	Day9 & Day36	Down Regulated
ENSG00000090104	RGS1	755.786	533.678	477.717	1756.69	251.228	173.53	489.857	331.63	233.896	111.614	322.634	275.66	Day9 & Day36	Down Regulated
ENSG00000112149	CD83	1116.84	1356.4	254.33	1519.09	359.315	430.981	306.928	401.976	158.521	67.8439	95.7725	79.2994	Only Day 36	Down Regulated
ENSG00000112137	PHACTR1	178.657	272.682	44.5266	223.349	57.4515	75.3861	51.5639	64.3161	42.7385	95.2003	42.4991	90.6279	Day9 & Day36	Down Regulated
ENSG00000113070	HBEGF	293.709	399.674	90.5625	432.441	96.4016	29.8699	96.9893	191.943	64.4964	41.5817	30.5275	78.0407	Day9 & Day36	Down Regulated
ENSG00000153234	NR4A2	855.872	1138.25	427.908	985.269	243.438	322.88	332.71	226.111	214.47	141.159	120.913	149.788	Day9 & Day36	Down Regulated
ENSG00000125538	IL1B	2205.62	3586.94	832.42	4031.37	907.538	618.735	568.431	1146.64	403.296	300.92	265.17	407.826	Day9 & Day36	Down Regulated
ENSG00000160789	LMNA	128.147	550.039	85.2797	304.135	32.1339	113.79	68.7519	98.4841	51.2863	165.233	46.0905	164.892	Day9 & Day36	Down Regulated
ENSG00000276085	CCL3L1	414.373	224.379	476.208	326.311	126.588	66.8518	178.018	32.1581	53.6175	18.6023	67.0408	41.5378	Day9 & Day36	Down Regulated
ENSG00000123358	NR4A1	381.635	675.473	265.65	647.87	95.4279	128.014	132.593	105.519	60.611	76.5979	61.6536	124.613	Day9 & Day36	Down Regulated
ENSG00000169429	CXCL8	10859.7	6820.95	1756.16	10489.5	1422.65	1790.77	1521.14	1614.94	508.2	408.157	397.456	186.291	Day9 & Day36	Down Regulated
ENSG00000124882	EREG	671.602	719.102	91.3172	440.362	82.7691	120.902	62.6133	127.627	202.037	78.7864	58.6607	55.3837	Day9 & Day36	Down Regulated
ENSG00000123689	G0S2	179.593	129.329	18.1125	264.534	32.1339	0	11.0494	57.2816	26.4202	8.75405	11.9716	32.7268	Day9 & Day36	Down Regulated
ENSG00000081041	CXCL2	84.1841	121.538	29.4328	171.076	8.76378	15.6462	13.5048	12.0593	15.5413	10.9426	9.57725	11.3285	Day9 & Day36	Down Regulated
ENSG00000173391	OLR1	115.052	244.635	10.5656	247.109	9.73754	12.8014	13.5048	17.084	9.32477	4.37702	2.39431	10.0698	Day9 & Day36	Down Regulated
ENSG00000130522	JUND	1214.12	1411.72	870.155	1105.66	873.457	921.701	1203.16	1007.95	465.462	546.034	721.886	579.012	Only Day 36	Down Regulated
ENSG00000134531	EMP1	39.2859	128.55	70.9406	109.298	29.2126	66.8518	47.8808	136.672	15.5413	59.0898	44.2948	54.125	Only Day 36	Down Regulated
ENSG00000165312	OTUD1	951.28	916.992	570.544	1207.03	806.268	805.066	710.845	1013.98	678.377	331.56	376.506	397.756	Only Day 36	Down Regulated
ENSG00000167604	NFKBID	153.402	213.471	126.033	112.466	93.4803	130.859	130.137	140.692	66.0505	68.9381	80.2095	78.0407	Only Day 36	Down Regulated
ENSG00000144802	NFKBIZ	4342.03	3759.12	2351.61	5338.2	4736.34	3884.52	2967.38	5485.97	2638.91	1414.87	1430.6	2070.6	Only Day 36	Down Regulated
ENSG00000213145	CRIP1	68.2827	130.887	67.1672	98.2101	50.6352	81.0756	52.7916	99.489	20.2037	76.5979	27.5346	45.314	Only Day 36	Down Regulated
ENSG00000134107	BHLHE40	314.287	469.014	215.841	403.929	127.562	278.786	252.909	274.349	121.222	165.233	172.391	197.619	Only Day 36	Down Regulated
ENSG00000160888	IER2	587.418	1038.53	479.981	1064.47	660.205	981.441	853.26	1701.36	226.126	414.723	284.923	531.18	Only Day 36	Down Regulated
ENSG00000175197	DDIT3	137.501	139.458	53.5828	209.093	119.772	68.2742	58.9302	127.627	83.1459	49.2415	60.4564	51.6076	Only Day 36	Down Regulated
ENSG00000203666	EFCAB2	312.417	387.209	252.82	380.168	251.228	314.346	279.918	317.561	132.878	179.458	132.286	157.34	Only Day 36	Down Regulated
ENSG00000170345	FOS	29315.7	33151.2	18876.2	30088.7	23102.3	22036.9	20149.2	24662.2	13516.3	13236.1	9689.19	13703.7	Only Day 36	Down Regulated
ENSG00000179029	TMEM107	289.967	351.371	562.242	408.681	313.549	308.656	591.757	413.03	150.751	175.081	205.911	191.326	Only Day 36	Down Regulated
ENSG00000159388	BTG2	1837.08	2056.02	1683.71	1915.1	1372.99	1108.03	1149.14	1909.39	1073.13	716.738	763.786	772.855	Only Day 36	Down Regulated
ENSG00000154710	RABGEF1	129.082	100.503	49.0547	91.874	69.1365	49.7832	63.841	71.3507	48.178	26.2621	33.5204	54.125	Only Day 36	Down Regulated
ENSG00000171223	JUNB	4016.52	6577.88	3731.18	5906.86	3854.12	3911.54	4225.79	6112.04	1899.15	2067.05	2621.77	2339.96	Only Day 36	Down Regulated
ENSG00000060138	YBX3	1955.88	2676.96	1316.18	2292.1	931.882	1422.38	1237.53	883.342	972.885	956.38	908.642	761.526	Only Day 36	Down Regulated
ENSG00000136826	KLF4	3020.34	3893.9	1950.87	3823.86	3331.21	4066.58	4068.64	4835.77	1575.89	1303.26	1335.43	1287.67	Only Day 36	Down Regulated
ENSG00000087074	PPP1R15A	2612.51	3781.71	1485.23	3597.34	1740.1	2435.11	2020.81	3087.17	878.083	1488.19	1064.27	1489.07	Only Day 36	Down Regulated
ENSG00000173846	PLK3	321.77	496.282	178.861	407.097	238.57	250.339	293.423	424.085	136.763	126.934	144.257	186.291	Only Day 36	Down Regulated
ENSG00000188042	ARL4C	319.9	644.309	460.359	266.118	217.147	311.501	379.363	124.613	120.445	182.741	279.536	128.39	Only Day 36	Down Regulated
ENSG00000173334	TRIB1	931.637	1058.01	449.794	883.891	448.9	291.588	471.442	778.828	403.296	296.543	348.971	348.666	Only Day 36	Down Regulated
ENSG00000120129	DUSP1	18963.9	24558.5	12408.6	22382.4	16155.5	14125.6	15939.4	18143.2	8604.44	7932.26	8120.91	8044.49	Only Day 36	Down Regulated
ENSG00000117425	PTCH2	41.1567	44.4083	39.2438	134.643	31.1601	55.4728	51.5639	87.4297	20.2037	31.7334	22.1474	31.468	Only Day 36	Down Regulated
ENSG00000128016	ZFP36	823.133	1086.83	584.128	1132.58	514.142	815.023	904.824	915.5	349.679	388.461	336.401	395.238	Only Day 36	Down Regulated
ENSG00000090924	PLEKHG2	78.5718	108.294	67.1672	166.324	70.1103	85.3427	101.9	110.543	37.2991	38.299	38.9076	52.8663	Only Day 36	Down Regulated
ENSG00000118515	SGK1	4559.97	4719.74	4149.27	5623.32	2382.78	2160.59	2330.2	3546.43	2321.09	1611.84	1618.56	1855.36	Only Day 36	Down Regulated
ENSG00000130164	LDLR	367.604	288.264	128.297	297.798	202.541	149.35	190.295	334.645	123.553	62.3726	78.4138	152.305	Only Day 36	Down Regulated
ENSG00000145632	PLK2	129.082	204.901	65.6578	134.643	67.189	85.3427	67.5242	62.3063	52.0633	48.1473	37.1119	61.6773	Only Day 36	Down Regulated
ENSG00000206560	ANKRD28	1263.7	1198.24	452.813	1237.13	585.226	654.294	649.46	788.878	497.321	426.76	352.563	279.436	Only Day 36	Down Regulated
ENSG00000144655	CSRNP1	578.999	886.607	315.459	746.08	364.184	334.259	408.828	821.036	228.457	166.327	283.726	246.709	Only Day 36	Down Regulated
ENSG00000067082	KLF6	6658.96	6932.36	3775.7	7297.65	3932.02	6316.78	5002.93	5023.69	2754.69	2216.96	1588.03	2071.86	Only Day 36	Down Regulated
ENSG00000138670	RASGEF1B	2784.62	2358.31	1118.45	2634.25	1602.8	1081.01	1430.28	2283.22	1262.73	504.452	691.358	537.474	Only Day 36	Down Regulated
ENSG00000185347	TEDC1	316.158	292.939	158.484	250.277	111.008	197.711	195.206	180.889	61.3881	65.6553	49.0834	112.026	Only Day 36	Down Regulated
ENSG00000158050	DUSP2	123.47	176.854	79.9969	267.702	130.483	89.6098	126.454	290.428	38.0762	38.299	51.4777	52.8663	Only Day 36	Down Regulated
ENSG00000078804	TP53INP2	122.535	155.818	58.8656	101.378	34.0814	64.007	68.7519	77.3803	30.3055	30.6392	20.9502	37.7616	Only Day 36	Down Regulated
ENSG00000177606	JUN	3737.77	4689.36	1479.19	4791.7	2621.34	4312.65	5288.98	4030.81	707.906	1099.73	1000.22	796.771	Only Day 36	Down Regulated
ENSG00000122877	EGR2	178.657	94.2702	123.014	136.227	233.701	73.9637	149.781	309.521	72.267	8.75405	25.7389	20.1395	Only Day 36	Down Regulated
ENSG00000182782	HCAR2	122.535	140.237	32.4516	118.803	65.2415	58.3175	74.8904	45.2223	24.089	22.9794	22.1474	27.6919	Only Day 36	Down Regulated
ENSG00000125740	FOSB	3408.52	4713.51	1592.39	4223.04	2063.38	2876.05	3075.42	2663.09	747.536	823.975	719.491	796.771	Only Day 36	Down Regulated
ENSG00000185022	MAFF	99.1502	139.458	25.6594	126.723	65.2415	62.5847	66.2965	147.726	17.8725	10.9426	14.9645	30.2093	Only Day 36	Down Regulated
ENSG00000099985	OSM	103.827	176.075	62.6391	183.748	43.8189	65.4294	33.1482	124.613	33.4138	12.0368	25.7389	11.3285	Only Day 36	Down Regulated
ENSG00000255398	HCAR3	89.7964	110.631	36.9797	137.811	45.7664	49.7832	83.4844	61.3013	11.656	14.2253	12.5701	15.1047	Only Day 36	Down Regulated
ENSG00000102760	RGCC	215.137	302.288	71.6953	291.462	105.165	112.368	158.375	117.578	37.2991	29.5449	44.2948	18.8808	Only Day 36	Down Regulated
